# Supplementary material
Source: ML conference proceedings conference paper supplement (https://aclanthology.org/D14-1158)
Supplement: Attachment [file plre_supp_material.pdf › plre_supp_material.pdf]

# Supplementary Material for Language Modeling with Power Low Rank Ensembles

Ankur P. Parikh, Avneesh Saluja, Chris Dyer, Eric P. Xing  
Carnegie Mellon University

[

The primary purpose of the supplementary material is to provide a proof of Lemma 4. We also show that Lemma 4 extends to  $n > 2$ .

## 1 Proof of Lemma 4

**Lemma 1.** Let  $P_{plre}(w_i|w_{i-1})$  indicate the PLRE smoothed conditional probability and  $\hat{P}(w)$  indicate the MLE probability of  $w$ . Then,

$$\hat{P}(w) = \sum_{w_{i-1}} P_{plre}(w_i|w_{i-1}) \hat{P}(w_{i-1}) \quad (1)$$

*Proof.* Assume the following more general form where multiple low rank matrices can be used i.e.:

$$P_{plre}(w_i|w_{i-1}) = P_{D_0}^{\text{alt}}(w_i|w_{i-1}) + \gamma_0(w_{i-1}) \left( \mathbf{Z}_{D_1}^{(\rho_1, \kappa_1)}(w_i|w_{i-1}) + \dots \right. \\ \left. + \gamma_{\eta-1}(w_{i-1}) \left( \mathbf{Z}_{D_\eta}^{(\rho_\eta, \kappa_\eta)}(w_i|w_{i-1}) + \gamma_\eta(w_{i-1}) \left( \mathbf{Z}^{(\rho_{\eta+1}=0, \kappa_{\eta+1}=1)}(w_i|w_{i-1}) \right) \right) \dots \right) \quad (2)$$

where we note that  $\mathbf{Z}^{(\rho_{\eta+1}=0, \kappa_{\eta+1}=1)}(w_i|w_{i-1})$  is equivalent to  $P^{\text{alt}}(w_i)$ . It is assumed that  $1 \geq \rho_0 \geq \dots \rho_{\eta+1} = 0$ .

First unroll the recursion and rewrite  $P_{plre}(w_i|w_{i-1})$  as:

$$P_{plre}(w_i|w_{i-1}) = \sum_{j=0}^{\eta+1} \gamma_{0:j-1}(w_{i-1}) \mathbf{Z}_{D_j}^{(\rho_j, \kappa_j)}(w_i|w_{i-1})$$

where  $\gamma_{0:j-1}(w_{i-1}) = \prod_{h=0}^{j-1} \gamma_h(w_{i-1})$  and  $\gamma_{0:-1}(w_{i-1}) = 1$ . Note that  $P_{pwr}(w_i|w_{i-1})$  can be written in the same way.

$$P_{pwr}(w_i|w_{i-1}) = \sum_{j=0}^{\eta} \gamma_{0:j}(w_{i-1}) \mathbf{Y}_{D_j}^{(\rho_j)}(w_i|w_{i-1}) \quad (3)$$

Note that  $P_{pwr}(w_i|w_{i-1})$  already satisfies the marginal constraint i.e.

$$\hat{P}(w) = \sum_{w_{i-1}} P_{pwr}(w_i|w_{i-1}) \hat{P}(w_{i-1}) \quad (4)$$

because the discounts were chosen such that  $P_{pwr}(w_i|w_{i-1}) = \hat{P}(w_i|w_{i-1})$

Thus it suffices to show that for all  $j = 0, \dots, \eta + 1$ :

$$\sum_{w_{i-1}} \hat{P}(w_{i-1}) \gamma_{0:j-1}(w_{i-1}) \mathbf{Y}_{D_j}^{(\rho_j)}(w_i|w_{i-1}) = \sum_{w_{i-1}} \hat{P}(w_{i-1}) \gamma_{0:j-1}(w_{i-1}) \mathbf{Z}_{D_j}^{(\rho_j, \kappa_j)}(w_i|w_{i-1}) \quad (5)$$

The statement above is trivially true when  $j = 0$ . For all other cases, note that due to the way we have set the discounts,  $\gamma_{0:j-1}$  takes a special form:

$$\begin{aligned} \prod_{h=0}^{j-1} \gamma_h(w_{i-1}) &= \frac{d_* \sum_i c_{i,i-1}^{\rho_1}}{\sum_i c_{i,i-1}^{\rho_0}} \frac{d_* \sum_i c_{i,i-1}^{\rho_2}}{\sum_i c_{i,i-1}^{\rho_1}} \cdots \frac{d_* \sum_i c_{i,i-1}^{\rho_j}}{\sum_i c_{i,i-1}^{\rho_{j-1}}} \\ &= \frac{(d_*)^j \sum_i c_{i,i-1}^{\rho_j}}{\sum_i c_{i,i-1}} \end{aligned} \quad (6)$$

Using this form in Eq. 5 and simplifying yields:

$$\sum_{w_{i-1}} \left( \sum_i c_{i,i-1}^{\rho_j} \right) \mathbf{Y}_{\mathbf{D}_j}^{(\rho_j)}(w_i | w_{i-1}) = \sum_{w_{i-1}} \left( \sum_i c_{i,i-1}^{\rho_j} \right) \mathbf{Z}_{\mathbf{D}_j}^{(\rho_j, \kappa_j)}(w_i | w_{i-1})$$

which is equivalent to requiring that

$$\sum_{w_{i-1}} \mathbf{Y}_{\mathbf{D}_j}^{(\rho_j)}(w_i, w_{i-1}) = \sum_{w_{i-1}} \mathbf{Z}_{\mathbf{D}_j}^{(\rho_j, \kappa_j)}(w_i, w_{i-1}) \quad (7)$$

which holds because rank minimization under  $gKL$  preserves row and column sums.  $\square$

## 2 Generalization to $n > 2$

**Theorem 1.** Let  $P_{plre}(w_i | w_{i-n+1}^{i-1})$  indicate the PLRE smoothed conditional probability and  $\hat{P}(w)$  indicate the MLE probability of  $w$ . Then,

$$\hat{P}(w) = \sum_{w_{i-n+1}^{i-1}} P_{plre}(w_i | w_{i-n+1}^{i-1}) \hat{P}(w_{i-n+1}^{i-1}) \quad (8)$$

*Proof.* Recall that,

$$\begin{aligned} P_{plre}(w_i | w_{i-n+1}^{i-1}) &= P_{\mathbf{D}_0}^{\text{alt}}(w_i | w_{i-n+1}^{i-1}) \\ &+ \gamma_0(w_{i-n+1}^{i-1}) \left( \mathbf{Z}_{\mathbf{D}_1}^{(\rho_1, \kappa_1)}(w_i | w_{i-n+1}^{i-1}) + \dots \right. \\ &+ \gamma_{\eta-1}(w_{i-n+1}^{i-1}) \left( \mathbf{Z}_{\mathbf{D}_\eta}^{(\rho_\eta, \kappa_\eta)}(w_i | w_{i-n+1}^{i-1}) \right. \\ &\left. \left. + \gamma_\eta(w_{i-n+1}^{i-1}) \left( P_{plre}(w_i | w_{i-n+2}^{i-1}) \right) \right) \dots \right) \end{aligned} \quad (9)$$

Define,

$$\begin{aligned} P_{pwr}(w_i | w_{i-n+1}^{i-1}) &= P_{\mathbf{D}_0}^{\text{alt}}(w_i | w_{i-n+1}^{i-1}) \\ &+ \gamma_0(w_{i-n+1}^{i-1}) \left( \mathbf{Y}_{\mathbf{D}_1}^{(\rho_1, \kappa_1)}(w_i | w_{i-n+1}^{i-1}) + \dots \right. \\ &+ \gamma_{\eta-1}(w_{i-n+1}^{i-1}) \left( \mathbf{Y}_{\mathbf{D}_\eta}^{(\rho_\eta, \kappa_\eta)}(w_i | w_{i-n+1}^{i-1}) \right. \\ &\left. \left. + \gamma_\eta(w_{i-n+1}^{i-1}) \left( P_{pwr}(w_i | w_{i-n+2}^{i-1}) \right) \right) \dots \right) \end{aligned} \quad (10)$$

where with a little abuse of notation

$$\mathbf{Y}_{\mathbf{D}_j}^{\rho_j}(w_i | w_{i-n'+1}^{i-1}) = \frac{\tilde{c}(w_i, w_{i-n'+1}^{i-1})^{\rho_j} - \mathbf{D}_j(w_i, w_{i-n'+1}^{i-1})}{\sum_{w_i} \tilde{c}(w_i, w_{i-n'+1}^{i-1})^{\rho_j}} \quad (11)$$

and

$$\tilde{c}(w_i, w_{i-n'+1}^{i-1}) = \begin{cases} c(w_i, w_{i-n'+1}^{i-1}), & \text{if } n' = n \\ N_-(w_{i-n'+1}^i) & \text{if } n' < n \end{cases}$$

Furthermore, define

$$\begin{aligned} P_{\text{pwr}}^{\text{terms}}(w_i | w_{i-n'+1}^{i-1}) &= P_{\mathbf{D}_0}^{\text{alt}}(w_i | w_{i-n'+1}^{i-1}) \\ &+ \gamma_0(w_{i-n'+1}^{i-1}) \left( \mathbf{Y}_{\mathbf{D}_1}^{(\rho_1, \kappa_1)}(w_i | w_{i-n'+1}^{i-1}) + \dots \right. \\ &\left. + \gamma_{\eta-1}(w_{i-n'+1}^{i-1}) \left( \mathbf{Y}^{(\rho_\eta, \kappa_\eta)}(w_i | w_{i-n'+1}^{i-1}) \right) \dots \right) \end{aligned} \quad (12)$$

Note that because of the way the discounts are computed in Algorithm 1,

$$P_{\text{pwr}}^{\text{terms}}(w_i | w_{i-n'+1}^{i-1}) = P^{\text{alt}}(w_i | w_{i-n'+1}^{i-1}) \quad (13)$$

for all  $n' \leq n$ .

As a result, (for some choice of discount)

$$P_{\text{pwr}}(w_i | w_{i-n+1}^{i-1}) = P_{\text{kn}}(w_i | w_{i-n+1}^{i-1}) \quad (14)$$

Since, we know that Kneser Ney satisfies the marginal constraint (Chen and Goodman, 1999) this implies that,

$$\hat{P}(w) = \sum_{w_{i-n+1}^{i-1}} P_{\text{pwr}}(w_i | w_{i-n+1}^{i-1}) \hat{P}(w_{i-n+1}^{i-1}) \quad (15)$$

Thus, all we have to do is prove that

$$\sum_{w_{i-n+1}^{i-1}} P_{\text{pwr}}(w_i | w_{i-n+1}^{i-1}) \hat{P}(w_{i-n+1}^{i-1}) = \sum_{w_{i-n+1}^{i-1}} P_{\text{pre}}(w_i | w_{i-n+1}^{i-1}) \hat{P}(w_{i-n+1}^{i-1}) \quad (16)$$

Now, we follow the same argument as with  $n = 2$  (i.e. unrolling the recursion and applying the fact that  $gKL$  preserves row/column sums).

For notational simplicity assume that  $n = 3$ . Then, we can write  $P_{\text{pwr}}(w_i | w_{i-n+1}^{i-1})$  as:

$$P_{\text{pwr}}(w_i | w_{i-2}^{i-1}) = \sum_{j=0}^{\eta} \gamma_{0:j-1}(w_{i-2}^{i-1}) \mathbf{Y}_{\mathbf{D}_j}^{(\rho_j, \kappa_j)}(w_i | w_{i-2}^{i-1}) + \sum_{j=0}^{\eta+1} \gamma_{0:\eta}(w_{i-2}^{i-1}) \gamma_{0:j-1}(w_{i-1}) \mathbf{Y}_{\mathbf{D}_j}^{(\rho_j, \kappa_j)}(w_i | w_{i-1}) \quad (17)$$

where  $\gamma_{0:-1}(w_{i-2}^{i-1}) = 1$  and

$$\begin{aligned} \gamma_{0:j-1}(w_{i-2}^{i-1}) &= \prod_{h=0}^{j-1} \gamma_h(w_{i-2}^{i-1}) = \frac{d_* \sum_i \tilde{c}_{i,i-1,i-2}^{\rho_1}}{\sum_i \tilde{c}_{i,i-1,i-2}^{\rho_0}} \frac{d_* \sum_i \tilde{c}_{i,i-1,i-2}^{\rho_2}}{\sum_i \tilde{c}_{i,i-1,i-2}^{\rho_1}} \dots \frac{d_* \sum_i \tilde{c}_{i,i-1,i-2}^{\rho_j}}{\sum_i \tilde{c}_{i,i-1,i-2}^{\rho_{j-1}}} \\ &= \frac{(d_*)^j \sum_i \tilde{c}_{i,i-1,i-2}^{\rho_j}}{\sum_i \tilde{c}_{i,i-1,i-2}} \end{aligned} \quad (18)$$

Here  $\tilde{c}_{i,i-1,i-2}$  is shorthand for  $\tilde{c}(w_i, w_{i-2}^{i-1})$ .

Similarly,  $\gamma_{0:-1}(w_{i-1}) = 1$  and

$$\begin{aligned}\gamma_{0:j-1}(w_{i-1}) &= \prod_{h=0}^{j-1} \gamma_h(w_{i-1}) = \frac{d_* \sum_i \tilde{c}_{i,i-1}^{\rho_1}}{\sum_i \tilde{c}_{i,i-1}^{\rho_0}} \frac{d_* \sum_i \tilde{c}_{i,i-1}^{\rho_2}}{\sum_i \tilde{c}_{i,i-1}^{\rho_1}} \cdots \frac{d_* \sum_i \tilde{c}_{i,i-1}^{\rho_j}}{\sum_i \tilde{c}_{i,i-1}^{\rho_{j-1}}} \\ &= \frac{(d_*)^j \sum_i \tilde{c}_{i,i-1}^{\rho_j}}{\sum_i \tilde{c}_{i,i-1}}\end{aligned}\quad (19)$$

(Again, it is assumed that  $1 \geq \rho_0 \geq \dots \rho_{\eta+1} = 0$ .)

Analogously,

$$P_{\text{pre}}(w_i | w_{i-2}^{i-1}) = \sum_{j=0}^{\eta} \gamma_{0:j-1}(w_{i-2}^{i-1}) \mathbf{Z}_{\mathbf{D}_j}^{(\rho_j, \kappa_j)}(w_i | w_{i-2}^{i-1}) + \sum_{j=0}^{\eta+1} \gamma_{0:\eta}(w_{i-2}^{i-1}) \gamma_{0:j-1}(w_{i-1}) \mathbf{Z}_{\mathbf{D}_j}^{(\rho_j, \kappa_j)}(w_i | w_{i-1}) \quad (20)$$

Now for any trigram term we prove that

$$\sum_{w_{i-2}^{i-1}} \gamma_{0:j-1}(w_{i-2}^{i-1}) \mathbf{Y}_{\mathbf{D}_j}^{(\rho_j, \kappa_j)}(w_i | w_{i-2}^{i-1}) \hat{P}(w_{i-2}^{i-1}) = \sum_{w_{i-2}^{i-1}} \gamma_{0:j-1}(w_{i-2}^{i-1}) \mathbf{Z}_{\mathbf{D}_j}^{(\rho_j, \kappa_j)}(w_i | w_{i-2}^{i-1}) \hat{P}(w_{i-2}^{i-1}) \quad (21)$$

Plugging in the definition of  $\gamma_{0:j-1}$  and simplifying gives

$$\sum_{w_{i-2}^{i-1}} \left( \sum_i \tilde{c}_{i,i-1,i-2}^{\rho_j} \right) \mathbf{Y}_{\mathbf{D}_j}^{(\rho_j, \kappa_j)}(w_i | w_{i-2}^{i-1}) = \sum_{w_{i-2}^{i-1}} \left( \sum_i \tilde{c}_{i,i-1,i-2}^{\rho_j} \right) \mathbf{Z}_{\mathbf{D}_j}^{(\rho_j, \kappa_j)}(w_i | w_{i-2}^{i-1}) \quad (22)$$

which is equivalent to

$$\sum_{w_{i-2}^{i-1}} \mathbf{Y}_{\mathbf{D}_j}^{(\rho_j, \kappa_j)}(w_i, w_{i-2}^{i-1}) = \sum_{w_{i-2}^{i-1}} \mathbf{Z}_{\mathbf{D}_j}^{(\rho_j, \kappa_j)}(w_i, w_{i-2}^{i-1}) \quad (23)$$

which holds because of the definition of  $\mathbf{Z}$  and the fact that rank minimization under  $gKL$  preserves row/column sums.

Now consider any bigram term. We seek to show that:

$$\begin{aligned}\sum_{w_{i-2}^{i-1}} \gamma_{0:\eta}(w_{i-2}^{i-1}) \gamma_{0:j-1}(w_{i-1}) \mathbf{Y}_{\mathbf{D}_j}^{(\rho_j, \kappa_j)}(w_i | w_{i-1}) \hat{P}(w_{i-2}^{i-1}) \\ = \sum_{w_{i-2}^{i-1}} \gamma_{0:\eta}(w_{i-2}^{i-1}) \gamma_{0:j-1}(w_{i-1}) \mathbf{Z}_{\mathbf{D}_j}^{(\rho_j, \kappa_j)}(w_i | w_{i-1}) \hat{P}(w_{i-2}^{i-1})\end{aligned}\quad (24)$$

Substituting definition of  $\gamma_{0:\eta}(w_{i-2}^{i-1})$  gives

$$\begin{aligned}\sum_{w_{i-2}^{i-1}} \frac{(d_*)^{\eta+1} \sum_i \tilde{c}_{i,i-1,i-2}^{\rho_{\eta+1}}}{\sum_i \tilde{c}_{i,i-1,i-2}} \gamma_{0:j-1}(w_{i-1}) \mathbf{Y}_{\mathbf{D}_j}^{(\rho_j, \kappa_j)}(w_i | w_{i-1}) \hat{P}(w_{i-2}^{i-1}) \\ = \sum_{w_{i-2}^{i-1}} \frac{(d_*)^{\eta+1} \sum_i \tilde{c}_{i,i-1,i-2}^{\rho_{\eta+1}}}{\sum_i \tilde{c}_{i,i-1,i-2}} \gamma_{0:j-1}(w_{i-1}) \mathbf{Z}_{\mathbf{D}_j}^{(\rho_j, \kappa_j)}(w_i | w_{i-1}) \hat{P}(w_{i-2}^{i-1})\end{aligned}\quad (25)$$

Simplifying and pushing in the sum over  $w_{i-2}$  gives,

$$\sum_{w_{i-1}} \left( \sum_{i,i-2} \tilde{c}_{i,i-1,i-2}^{\rho_{\eta+1}} \right) \gamma_{0:j-1}(w_{i-1}) \mathbf{Y}_{\mathbf{D}_j}^{(\rho_j, \kappa_j)}(w_i | w_{i-1}) = \sum_{w_{i-1}} \left( \sum_{i,i-2} \tilde{c}_{i,i-1,i-2}^{\rho_{\eta+1}} \right) \gamma_{0:j-1}(w_{i-1}) \mathbf{Z}_{\mathbf{D}_j}^{(\rho_j, \kappa_j)}(w_i | w_{i-1}) \quad (26)$$

Note that since  $\rho_{\eta+1} = 0$ ,  $\sum_{i,i-2} \tilde{c}_{i,i-1,i-2}^{\rho_{\eta+1}=0} = \sum_i \tilde{c}_{i,i-1}$  (by definition of  $\tilde{c}$ ).

Using this fact and substituting definition of  $\gamma_{0:j-1}(w_{i-1})$  gives

$$\sum_{w_{i-1}} \left( \sum_i \tilde{c}_{i,i-1} \right) \frac{(d_*)^j \sum_i \tilde{c}_{i,i-1}^{\rho_j} \mathbf{Y}_{\mathbf{D}_j}^{(\rho_j, \kappa_j)}(w_i | w_{i-1})}{\sum_i \tilde{c}_{i,i-1}} = \sum_{w_{i-1}} \left( \sum_i \tilde{c}_{i,i-1} \right) \frac{(d_*)^j \sum_i \tilde{c}_{i,i-1}^{\rho_j} \mathbf{Z}_{\mathbf{D}_j}^{(\rho_j, \kappa_j)}(w_i | w_{i-1})}{\sum_i \tilde{c}_{i,i-1}} \quad (27)$$

Simplifying gives,

$$\sum_{w_{i-1}} \mathbf{Y}_{\mathbf{D}_j}^{(\rho_j)}(w_i, w_{i-1}) = \sum_{w_{i-1}} \mathbf{Z}_{\mathbf{D}_j}^{(\rho_j, \kappa_j)}(w_i, w_{i-1}) \quad (28)$$

which holds because rank minimization under KL divergence preserves row and column sums.  $\square$

## References

Stanley F. Chen and Joshua Goodman. 1999. An empirical study of smoothing techniques for language modeling. *Computer Speech & Language*, 13(4):359–393.
